# Supplementary material for: Breaking the trade-off between ΔEST and oscillator strength in hybrid LR/SR-CT compounds for enhanced TADF performance
Source: Royal Society of Chemistry journal article supplement (doi:10.1039/d4tc04549a), 2024-11-13
Supplement: d4tc04549a1.pdf [file d4tc04549a1.pdf]

# Supporting Information: Breaking the Trade-off Between $\Delta E_{\text{ST}}$ and Oscillator Strength in Hybrid LR/SR-CT Compounds for Enhanced TADF Performance

Nikhitha R.<sup>1</sup> and Anirban Mondal<sup>1,\*</sup>

<sup>1</sup>Department of Chemistry, Indian Institute of Technology Gandhinagar, Gujarat, 382355,  
India

October 25, 2024

E-mail: amondal@iitgn.ac.in

## S1 Internal and External Quantum efficiencies

The Internal Quantum Efficiency (IQE) can be calculated using equation 1:<sup>1</sup>

$$\phi_{\text{IQE}} = \eta_{\text{r}}(S_1)\phi_{\text{PF}} + \eta_{\text{r}}(S_1)\phi_{\text{ISC}}\phi_{\text{RISC}} + \eta_{\text{r}}(T_1)\phi_{\text{RISC}} \quad (1)$$

Here,  $\eta_{\text{r}}(S_1) = 0.25$  and  $\eta_{\text{r}}(T_1) = 0.75$ , which is the splitting of the singlet and triplet excitons according to spin statistics, respectively.  $\phi_{\text{PF}}$ ,  $\phi_{\text{ISC}}$ , and  $\phi_{\text{RISC}}$  denote the corresponding efficiencies of prompt fluorescence, inter-system crossing, and reverse inter-system crossing. These values are obtained using the following expressions:<sup>2,3</sup>

$$\phi_{\text{PF}} = 1 - \phi_{\text{ISC}} \quad (2)$$

$$\phi_{\text{ISC}} = \frac{k_{\text{ISC}}}{k_{\text{PF}}} \quad (3)$$

$$\phi_{\text{RISC}} = \frac{\phi_{\text{TADF}}}{\phi_{\text{ISC}}} \quad (4)$$

$$\phi_{\text{TADF}} = \frac{k_{\text{ISC}} k_{\text{RISC}} \phi_{\text{PF}}}{k_{\text{PF}} k_{\text{TADF}}} \quad (5)$$

where  $k_{\text{PF}}$ ,  $k_{\text{ISC}}$ ,  $k_{\text{RISC}}$ , and  $k_{\text{TADF}}$  are the corresponding rates of prompt fluorescence, inter-system crossing, reverse inter-system crossing, and delayed fluorescence in  $\text{s}^{-1}$ .  $\phi_{\text{TADF}}$  is the efficiency of the TADF process.

External Quantum Efficiency (EQE) is evaluated using:<sup>2</sup>

$$\phi_{\text{EQE}} = \phi_{\text{IQE}} \eta_{\text{out}} \quad (6)$$

$\eta_{\text{out}}$  is the light outcoupling efficiency having values in the range of 0.2 to 0.3.<sup>2</sup> We have taken a value of 0.25 as the light outcoupling efficiency. The unphysical EQE values obtained for compounds A6 and A11 are attributed to the large  $k_{\text{ISC}}$  rates that are an order of magnitude higher than the corresponding  $k_{\text{PF}}$  rates.

Table S1: Calculated spin-orbit coupling ( $H_{\text{SO}}^{\text{S}_1\text{T}_1}$  in  $\text{cm}^{-1}$ ), reorganization energy values of ISC ( $\lambda_{\text{ISC}}$  in eV) and RISC ( $\lambda_{\text{RISC}}$  in eV) for the designed emitters.

| Compounds | $H_{\text{SO}}^{\text{S}_1\text{T}_1}$ | $\lambda_{\text{ISC}}$ | $\lambda_{\text{RISC}}$ |
|-----------|----------------------------------------|------------------------|-------------------------|
| A1        | 0.14                                   | 0.546                  | 0.198                   |
| A2        | 0.09                                   | 0.071                  | -0.100                  |
| A3        | 0.28                                   | 0.304                  | 0.109                   |
| A4        | 0.12                                   | -0.004                 | 0.085                   |
| A5        | 0.06                                   | 0.005                  | 0.031                   |
| A6        | 1.47                                   | 0.197                  | -0.011                  |
| A7        | 0.14                                   | 0.173                  | 0.061                   |
| A8        | 0.09                                   | 0.059                  | -0.033                  |
| A9        | 0.02                                   | 0.001                  | -0.001                  |
| A10       | 0.11                                   | 0.044                  | -0.024                  |
| A11       | 0.58                                   | 0.049                  | -0.021                  |

Table S2: Computed bary center distance between electron-rich and electron-deficient regions ( $D_{\text{CT}}$ , Å), their overlap integral ( $S_{\pm}$ ), ground state ( $\mu_{\text{S}_0}$ ) and excited state ( $\mu_{\text{S}_1}$ ) dipole moments (in Debye) for the designed emitters.

| Compounds | $D_{\text{CT}}$ | $S_{\pm}$ | $\mu_{\text{S}_0}$ | $\mu_{\text{S}_1}$ |
|-----------|-----------------|-----------|--------------------|--------------------|
| A1        | 3.220           | 0.738     | 0.7485             | 0.5868             |
| A2        | 3.457           | 0.654     | 1.3498             | 1.1428             |
| A3        | 3.556           | 0.760     | 0.9505             | 0.6482             |
| A4        | 3.369           | 0.705     | 2.3172             | 2.5366             |
| A5        | 3.975           | 0.643     | 0.8589             | 0.8470             |
| A6        | 4.266           | 0.622     | 1.0276             | 0.6596             |
| A7        | 4.175           | 0.700     | 0.6853             | 0.6577             |
| A8        | 0.005           | 0.943     | 0.0002             | 0.0002             |
| A9        | 0.004           | 0.845     | 0.0005             | 0.0004             |
| A10       | 0.001           | 0.986     | 0.0002             | 0.0002             |
| A11       | 1.951           | 0.859     | 2.1637             | 2.3937             |

Table S3: Computed IFCT values for the designed emitters.

| Compounds | CT (%) | LE (%) |
|-----------|--------|--------|
| A1        | 35.311 | 64.689 |
| A2        | 45.964 | 54.036 |
| A3        | 37.904 | 62.096 |
| A4        | 38.085 | 61.915 |
| A5        | 40.362 | 59.638 |
| A6        | 30.323 | 69.677 |
| A7        | 25.554 | 74.446 |
| A8        | 0.047  | 99.953 |
| A9        | 0.013  | 99.987 |
| A10       | 2.896  | 97.104 |
| A11       | 24.030 | 75.970 |

Table S4: Computed EQE (%) for the designed emitters.

| Compounds | EQE   |
|-----------|-------|
| A1        | 26.65 |
| A2        | 24.15 |
| A3        | 26.65 |
| A4        | 23.06 |
| A5        | 24.56 |
| A6        | —     |
| A7        | 24.81 |
| A8        | 23.92 |
| A9        | 24.87 |
| A10       | 23.87 |
| A11       | —     |

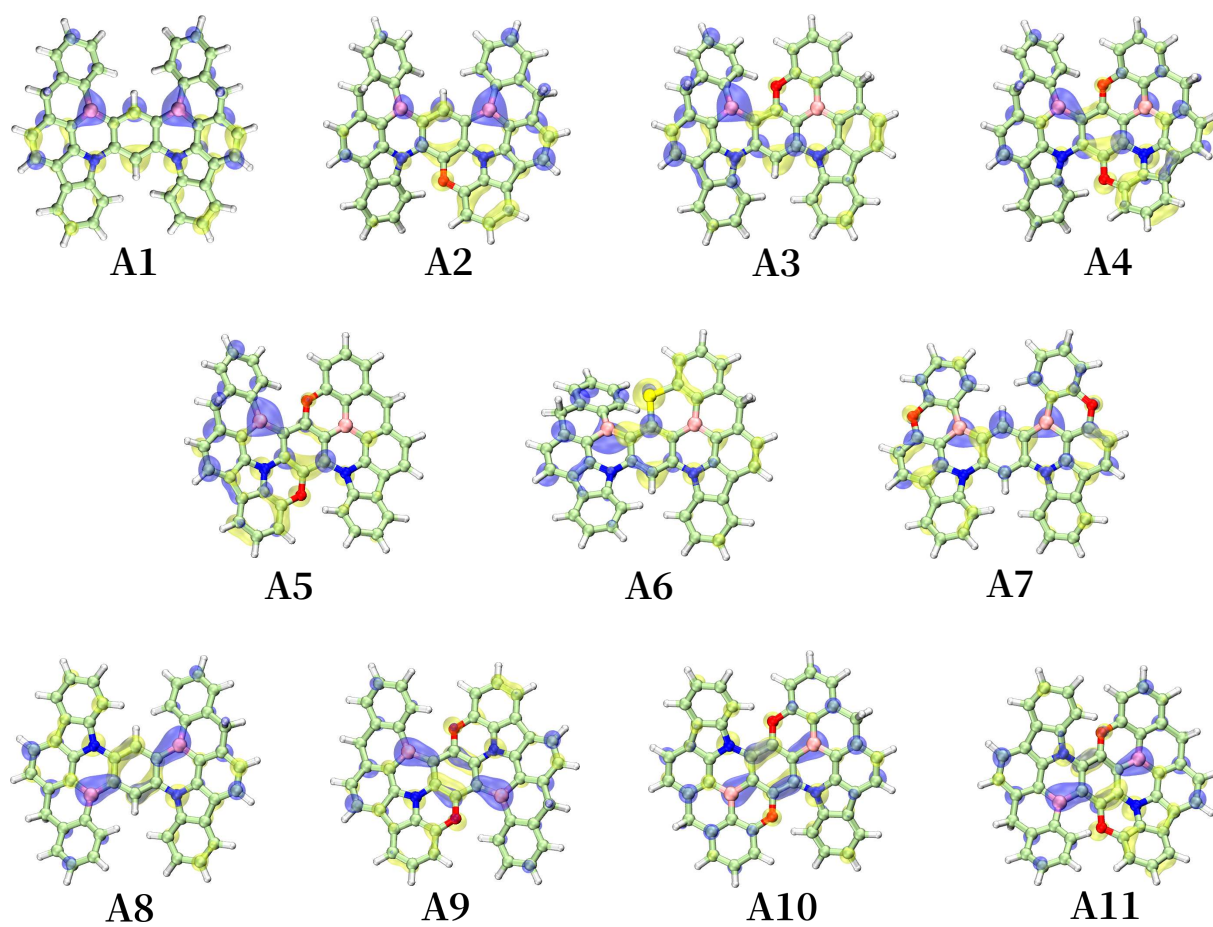

Figure S1: Frontier molecular orbital (HOMO in yellow and LUMO in blue) plot of the designed hybrid TADF emitters in the present study.

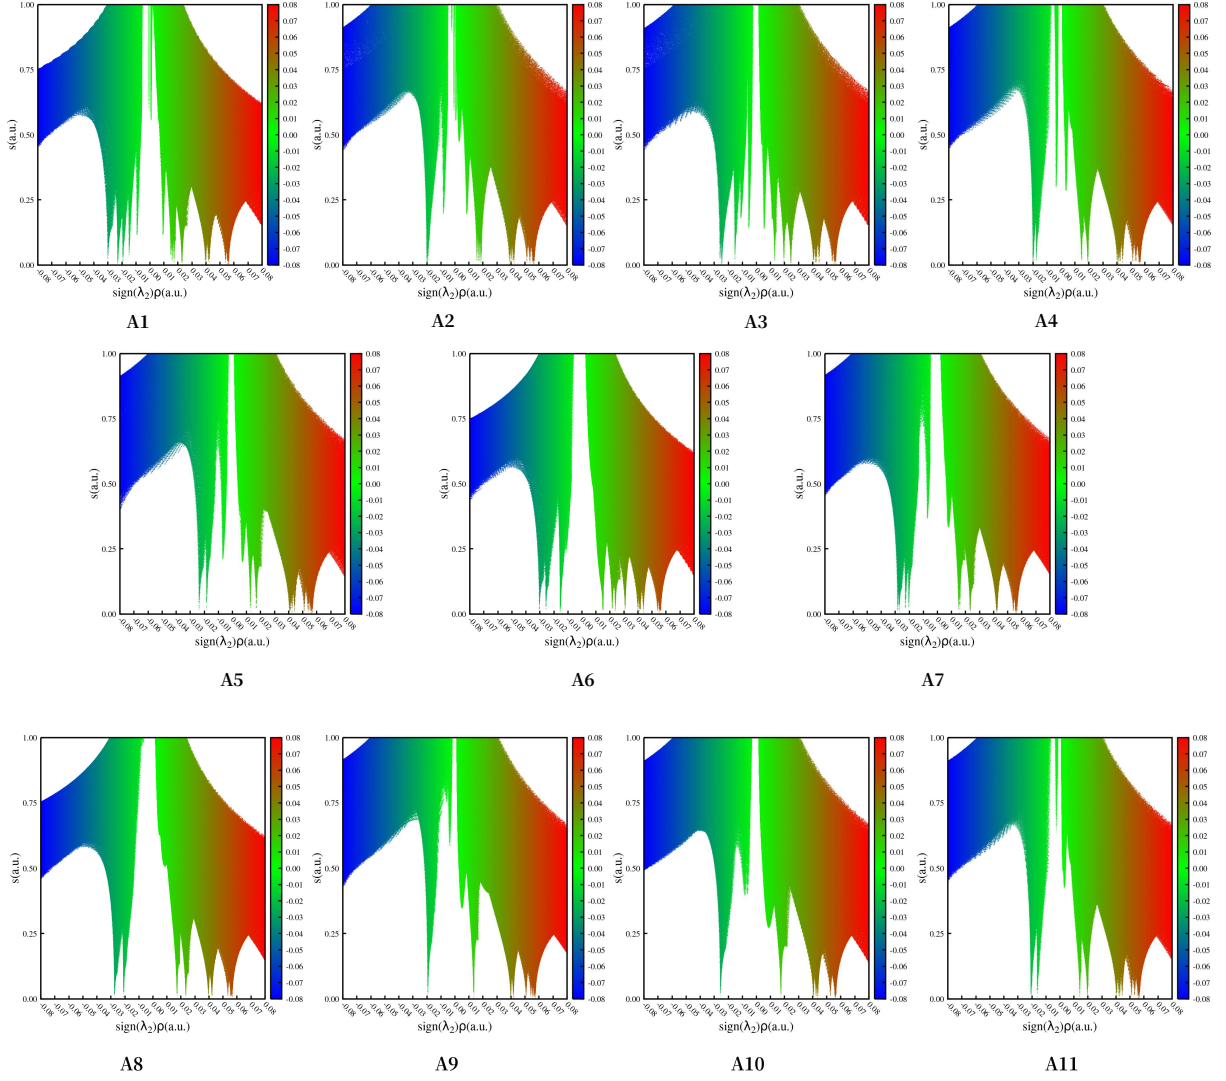

Figure S2: Reduced density gradient (RDG) plots for the designed emitters.

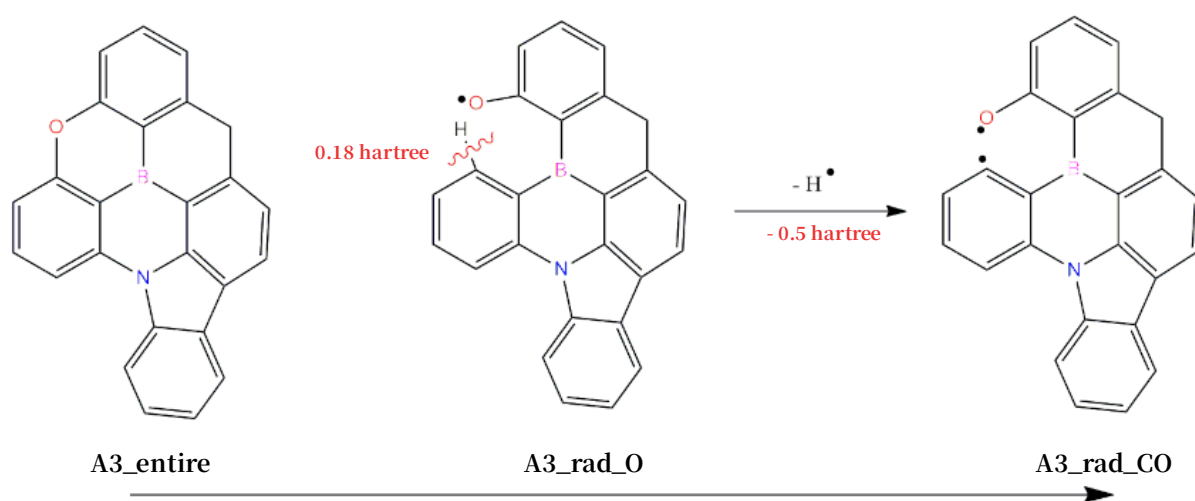

Figure S3: Schematic representation of the bond dissociation energy (BDE) calculation for the C-O bond in Compound A3. The intact molecule (A3\_entire) is fragmented into a radical (A3\_rad\_O) by cleaving the C-O bond. The geometries of both the entire molecule and the radical fragment were optimized at the B3LYP/6-31G(d,p) level with D3BJ dispersion correction. The BDE is determined by subtracting the energy of the radical fragment from that of the intact molecule.

## S2 References

- [S1] Endo, A.; Sato, K.; Yoshimura, K.; Kai, T.; Kawada, A.; Miyazaki, H.; Adachi, C. Efficient up-conversion of triplet excitons into a singlet state and its application for organic light emitting diodes. *Appl. Phys. Lett.* **2011**, *98*, 083302.
- [S2] Lee, S. Y.; Yasuda, T.; Komiyama, H.; Lee, J.; Adachi, C. Thermally Activated Delayed Fluorescence Polymers for Efficient Solution-Processed Organic Light-Emitting Diodes. *Adv. Mater.* **2016**, *28*, 4019–4024.
- [S3] Shakeel, U.; Singh, J. Study of processes of reverse intersystem crossing (RISC) and thermally activated delayed fluorescence (TADF) in organic light emitting diodes (OLEDs). *Org. Electron.* **2018**, *59*, 121–124.
